# Supplementary material for: Genome-Wide Association for Itraconazole Sensitivity in Non-resistant Clinical Isolates of Aspergillus fumigatus
Source: PubMed Central journal article supplement (PMC10512406; doi:10.3389/ffunb.2020.617338), 2021-01-14
Supplement: Image_3.pdf [file Image_3.pdf]

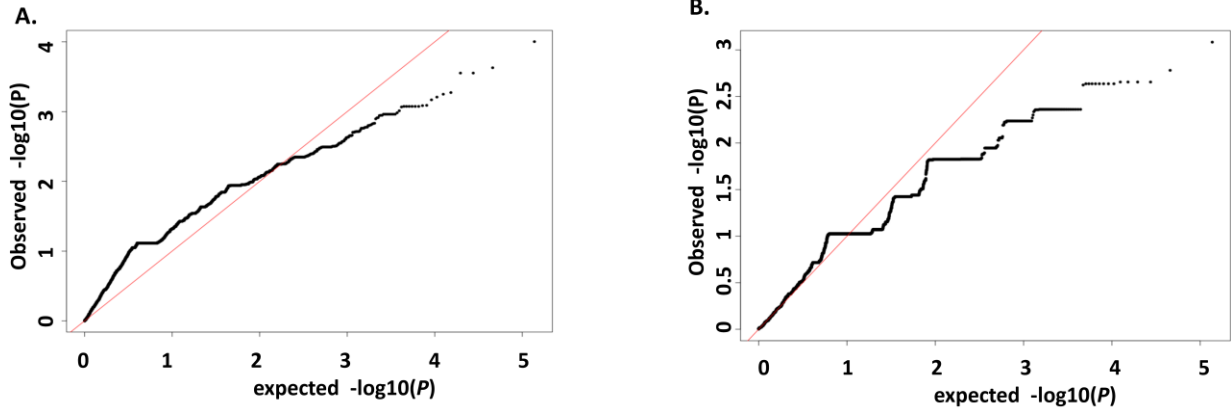

**Figure S3. Quantile-quantile (Q-Q) plots of  $-\log_{10}(P\text{-value})$  from GWA analysis of *A. fumigatus* ITCZ sensitivity using Tassel (A) and RoadTrips (B).** In each of the plots, Y-axis displays the quantile distribution of observed  $-\log_{10}(P\text{-value})$  while X-axis shows the quantile distribution of expected  $-\log_{10}(P\text{-value})$ .
