# Supplementary material for: Genome-Wide Association for Itraconazole Sensitivity in Non-resistant Clinical Isolates of Aspergillus fumigatus
Source: PubMed Central journal article supplement (PMC10512406; doi:10.3389/ffunb.2020.617338), 2021-01-14
Supplement: Image_5.pdf [file Image_5.pdf]

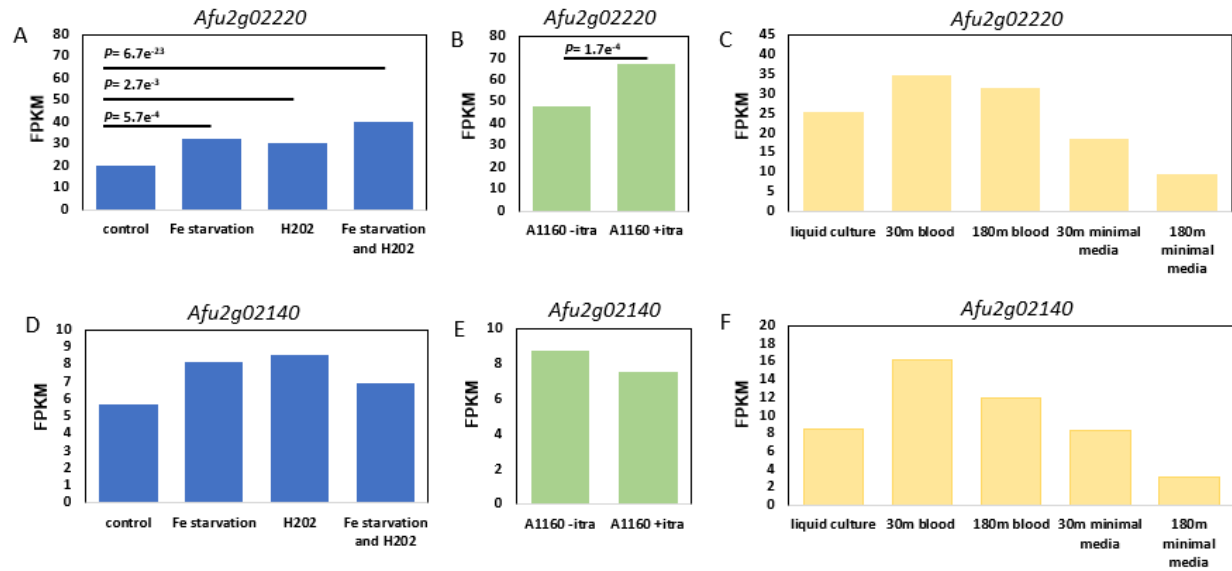

**Figure S5. The expression of *Afu2g02220* (A, B, C) and *Afu2g02140* (D, E, F) in various conditions from RNA-seq data publicly available through FungiDB. FPKM (Fragments Per Kilobase of transcript per Million mapped reads) is displayed on Y-axis, while the X-axis represents experimental conditions. Bars are colored by study. *P*-values are reported for significant pairwise differential expression within the same study.**
